# Supplementary material
Source: PubMed Central journal article supplement (PMC5541884)
Supplement: 2016.161711.CAMPOS_MARTIN_SUPPL.pdf [file 2016.161711.CAMPOS_MARTIN_SUPPL.pdf]

**Clinical and diagnostic relevance of NOTCH2 and KLF2 mutations in splenic marginal zone lymphoma**

---

Yolanda Campos-Martín,<sup>1</sup> Nerea Martínez,<sup>2</sup> Azahara Martínez-López,<sup>1</sup> Laura Cereceda,<sup>2</sup> Felipe Casado,<sup>3</sup> Patrocinio Algara,<sup>4</sup> David Oscier,<sup>5</sup> Francisco J. Menarguez,<sup>6</sup> Juan F. García,<sup>7</sup> Miguel A Piris<sup>8</sup> and Manuela Mollejo<sup>1</sup>

<sup>1</sup>Department of Pathology, Hospital Virgen de la Salud, Toledo, Spain; <sup>2</sup>Department of Pathology, Hospital Universitario Marqués de Valdecilla, Cancer Genomics Laboratory, IDIVAL, Santander, Spain; <sup>3</sup>Department of Haematology, Hospital Virgen de la Salud, Toledo, Spain; <sup>4</sup>Department of Genetics, Hospital Virgen de la Salud, Toledo, Spain; <sup>5</sup>Department of Haematology, Royal Bournemouth Hospital, UK; <sup>6</sup>Department of Pathology, Hospital Gregorio Marañón, Madrid, Spain; <sup>7</sup>Department of Pathology, MD Anderson, Madrid, Spain and <sup>8</sup>Department of Pathology, Fundación Jiménez Díaz, Madrid, Spain

Correspondence: [ycampos@sescam.jccm.es](mailto:ycampos@sescam.jccm.es)  
doi:10.3324/haematol.2016.161711

Table 1. Supplementary

Primers used for PCR and Sanger sequencing of the *NOTCH2* and *KLF2* genes

| Gene                 | Exon      | Primer name  | Sequence (5'-3')     | Amplicon size (bp) | PCR Condition |
|----------------------|-----------|--------------|----------------------|--------------------|---------------|
| <b><i>NOTCH2</i></b> | <b>34</b> | NOTCH2_AF    | CAGTGCCAAGAGTACCATGC | 185                | 65°C          |
|                      |           | NOTCH2_AR    | GAGAGGATGTGGTGTCCGAA |                    |               |
| <b><i>NOTCH2</i></b> | <b>34</b> | NOTCH2_BF    | TTGCTATCCCACCACCACAT | 289                | 65°C          |
|                      |           | NOTCH2_BR    | CCGCTGGTTGGGCAATACT  |                    |               |
| <b><i>NOTCH2</i></b> | <b>34</b> | NOTCH2_CF    | CAGCCTCAGTCCACCTGC   | 341                | 65°C          |
|                      |           | NOTCH2_CR    | CAGTCAGAAGCAGAGTGGGG |                    |               |
| <b><i>KLF2</i></b>   | <b>1</b>  | KLF2.1_1F    | GCCACTCACCGGTGTCC    | 196                | 60°C          |
|                      |           | KLF2.1_1R    | GCAGCCCATGTTCTACTACC |                    |               |
| <b><i>KLF2</i></b>   | <b>2</b>  | KLF2.2_1 F   | TAGGGTGGTAAAAGGCAAGC | 287                | 55°C          |
|                      |           | KLF2.2_2 R   | GCAGCAGCTCAGACACCAG  |                    |               |
| <b><i>KLF2</i></b>   | <b>2</b>  | KLF2.2_4Fnew | CCTGGTGTCTGAGCTGCTG  | 218                | 60°C          |
|                      |           | KLF2.2_4Rnew | GACCTCGCATGCACGAAG   |                    |               |
| <b><i>KLF2</i></b>   | <b>2</b>  | KLF2.2_5Fnew | CTTCGTGCATGCGAGGTC   | 201                | 55°C          |
|                      |           | KLF2.2_5Rnew | CGTCGAAGAGACCGAAGG   |                    |               |
| <b><i>KLF2</i></b>   | <b>2</b>  | KLF2.2_6F    | ACACACCGCCGCTCAG     | 349                | 55°C          |
|                      |           | KLF2.2_7R    | TGCGAACTCTTGGTGTAGGT |                    |               |
| <b><i>KLF2</i></b>   | <b>2</b>  | KLF2.2_7F    | CCCAGCCTTCGGTCTCTTC  | 331                | 55°C          |
|                      |           | KLF2.2_8R    | AAATTCATTTTCTGGCGCGC |                    |               |
| <b><i>KLF2</i></b>   | <b>3</b>  | KLF2.3_1F    | GGGGAAGTACGCTTACTCT  | 340                | 55°C          |
|                      |           | KLF2.3_2R    | CTCTGTAGCCACGCTGTGC  |                    |               |

Table 2. Supplementary

| ID     | NOTCH2              |             |                     | Second variation NOTCH2 |           |               | KLF2               |               |                     | Somatic status |
|--------|---------------------|-------------|---------------------|-------------------------|-----------|---------------|--------------------|---------------|---------------------|----------------|
|        | Nucleotide Change   | aa Change   | Mutation type       | Nucleotide Change       | aa Change | Mutation type | Nucleotide Change  | aa Change     | Mutation type       |                |
| SMZL20 | c.7075C>G           | p.P2359A    | Missense            |                         |           |               | WT                 |               |                     | N/A            |
| SMZL46 | c.7075C>G           | p.P2359A    | Missense            |                         |           |               | WT                 |               |                     | N/A            |
| SMZL70 | c.7075C>G           | p.P2359A    | Missense            |                         |           |               | --                 |               |                     | N/A            |
| SMZL71 | c.6449delCT         | p.P2150fs*1 | Frameshift deletion | c.7075C>G               | p.P2359A  | Missense      | --                 |               |                     | Yes            |
| SMZL77 | c.7075C>G           | p.P2359A    | Missense            |                         |           |               | WT                 |               |                     | N/A            |
| SMZL18 | c.7198C>T           | p.R2400*    | Non sense           |                         |           |               | c.823-825 del 3pb  | p.S275delS    | In Frame deletion   | N/A            |
| SMZL62 | c.7198C>T           | p.R2400*    | Non sense           |                         |           |               | --                 |               |                     | N/A            |
| SMZL25 | c.7198C>T           | p.R2400*    | Non sense           |                         |           |               | WT                 |               |                     | Yes            |
| SMZL32 | c.7198C>T           | p.R2400*    | Non sense           |                         |           |               | WT                 |               |                     | Yes            |
| SMZL50 | c.7223T>A           | p.L2408H    | Missense            |                         |           |               | --                 |               |                     | N/A            |
| SMZL83 | c.6909delC          | p.I2304fs*2 | Frameshift deletion | c.7223T>A               | p.L2408H  | Missense      | --                 |               |                     | N/A            |
| SMZL34 | c.6449delCT         | p.P2150fs*1 | Frameshift deletion |                         |           |               | WT                 |               |                     | Yes            |
| SMZL76 | c.7165C>T           | p.Q2389*    | Non sense           | c.7064C>A               | p.T2355N  | Missense      | c.81 G>A           | p.W27*        | Non sense           | N/A            |
| SMZL10 | c.6344_6358del 14pb | p.S2115fs*9 | Frameshift deletion |                         |           |               | WT                 |               |                     | Yes            |
| SMZL6  | WT                  |             |                     |                         |           |               | c.988-997 del 10pb | p.R330fs*19   | Frameshift deletion | N/A            |
| SMZL3  | WT                  |             |                     |                         |           |               | c.76 del 1pb       | p.R26fs*115   | Frameshift deletion | N/A            |
| SMZL38 | WT                  |             |                     |                         |           |               | c.815-877 del 63pb | p.H272del21AA | In Frame deletion   | Yes            |
| SMZL59 | WT                  |             |                     |                         |           |               | c.560_570 del 11pb | p.P187fs*109  | Frameshift deletion | N/A            |
| SMZL28 | WT                  |             |                     |                         |           |               | c.798 del 1pb      | p.R266fs*24   | Frameshift deletion | N/A            |
| SMZL37 | WT                  |             |                     |                         |           |               | c.554-564 del 11pb | p.P185fs*111  | Frameshift deletion | N/A            |
| SMZL4  | WT                  |             |                     |                         |           |               | c.976 C>T          | p.H326Y       | Missense            | N/A            |
| SMZL1  | WT                  |             |                     |                         |           |               | c.862 C>T          | p.H288Y       | Missense            | N/A            |

Table 3. Supplementary

| <b>Clinical findings</b>                                 | <b>N°</b>           |
|----------------------------------------------------------|---------------------|
| Patients SMZL                                            | 84                  |
| Age at diagnosis, mean (range)                           | 64 (32-98)          |
| Sex (male/female)                                        | 25/51               |
| Hemoglobin mean (g/dL)                                   | 10,9 (range 7-16.7) |
| White blood cell median (x10 <sup>9</sup> /L)            | 9 (range 0.12-84)   |
| Lymphocyte count (x10 <sup>9</sup> /L)                   | 8 (range 0.3-75)    |
| Platelet median (x 10 <sup>9</sup> /L)                   | 171 (range 0.5-761) |
| Lymph node involvement                                   | 19/47 (40%)         |
| Treatment at diagnosis (splenectomy and/or chemotherapy) | 46/76 (60%)         |
| Splenectomy                                              | 43/46               |
| Chemotherapy                                             | 3/46                |
| Treatment at any moment                                  | 76/80 (95%)         |
| Splenectomy                                              | 70/78               |
| Chemotherapy                                             | 30/60               |
| Large B cell transformation                              | 6/78 (8.3%)         |
| Patients assessable for OS                               | 77                  |
| Dead                                                     | 25/77 (33,3%)       |
| Patients assessable for EFS                              | 67                  |
| Event free survival (clinical progression, death, LBCL)  | 29/67 (43.2%)       |
| Patients assessable for TFS                              | 75                  |
| Treatment-free survival (months)                         | 16,8 (range 1-163)  |
