# Supplementary material
Source: PubMed Central journal article supplement (PMC5541884)
Supplement: 2016_161711-Disclosures_and_Contributions.pdf [file 2016_161711-Disclosures_and_Contributions.pdf]

Haematologica  
HAEMATOL/2016/161711  
Version 3

Clinical and diagnostic relevance of NOTCH2 and KLF2 mutations in  
splenic marginal zone lymphoma

Yolanda Campos-Martín, Nerea Martínez, Azahara Martínez-López,  
Laura Cereceda, Felipe Casado, Patrocinio Algara, David Oscier,  
Francisco J Menarguez, Juan F. García, Miguel A Piris, and Manuela  
Mollejo

Disclosures: The authors declare no conflicts of interest

Contributions: YCM collected samples, performed sequencing analysis, sequencing trace analysis and wrote the manuscript. NM performed sequencing analysis. AML collected clinical data. LC collected samples and clinical data. FC provided clinical data and statistical analysis. PA sequencing trace analysis. DO, FJM, JFG provided clinical samples and performed diagnoses. MAP designed the study, supervised the project and helped write the manuscript. MM designed the study, statistical analysis, supervised the project and wrote the manuscript
